# Supplementary material
Source: PubMed Central journal article supplement (PMC5330318)
Supplement: NIHMS848212-supplement-supplement.pdf [file NIHMS848212-supplement-supplement.pdf]

**Supplemental File. Guidance on tailoring capacity building contingent on salient variations with citation to sources**

| Salient Variation                                                       | Guidance for Tailoring Capacity Building                                                                                               |                                                                                                                                                                                                                                                                                                                                      |                                                                                                                                                                                                                                                                                                                                                                                                                                       |
|-------------------------------------------------------------------------|----------------------------------------------------------------------------------------------------------------------------------------|--------------------------------------------------------------------------------------------------------------------------------------------------------------------------------------------------------------------------------------------------------------------------------------------------------------------------------------|---------------------------------------------------------------------------------------------------------------------------------------------------------------------------------------------------------------------------------------------------------------------------------------------------------------------------------------------------------------------------------------------------------------------------------------|
| Factor                                                                  | EBI Selection/Marketing                                                                                                                | CB Structure & Types (in addition to Training, TA, Tools)                                                                                                                                                                                                                                                                            | CB Focus                                                                                                                                                                                                                                                                                                                                                                                                                              |
| <b>EBI: Complexity</b><br>1-4                                           | <b>When high</b><br>Select a different EBI.<br>Market EBIs in formats that promote their adaptability and triability. <sup>2,5,6</sup> | <b>When high</b><br>Provide more CB ( <i>dose</i> ) than when lower. <sup>7</sup>                                                                                                                                                                                                                                                    | <b>When high</b><br>Focus on capacity to assess local contexts, select and adapt EBIs to fit context, and develop infrastructure to manage interdependency. <sup>4,8 9</sup>                                                                                                                                                                                                                                                          |
| <b>EBI: Uncertainty</b><br>3,9-13                                       | <b>When low</b><br>Select standardized EBIs. <sup>9</sup><br><br><b>When high</b><br>Select broad, flexible EBIs.<br>3,9,14            | <b>When high</b><br>Provide more CB ( <i>dose</i> ) than when lower. <sup>7</sup><br>Strengthen CB <i>provider/recipient collaboration</i> . <sup>7,9,11</sup><br>Facilitate <i>peer networking</i> .<br><i>Assess and provide feedback</i> on performance. <sup>10,13</sup>                                                         | <b>When low</b><br>Focus on capacity to adapt to local context, and implement with fidelity. <sup>9</sup><br><br><b>When high</b><br>Focus on capacity to engage stakeholders, facilitate ongoing and open communication, collect local data, develop a shared understanding of problem, and collectively formulate an intervention plan.<br>3,5-7,9,10                                                                               |
| <b>Context: Setting's Decision-making structure</b> <sup>10,15,16</sup> |                                                                                                                                        | <b>When hierarchical, centralized</b><br>Tailor and deliver CB to those working at different levels of the organization ( <i>target audience</i> ).<br>4,17,18<br><br><b>When horizontal, decentralized</b><br>Deliver CB to the coalition or team ( <i>target audience</i> ) that will plan and implement the EBI. <sup>19,20</sup> | <b>When hierarchical, centralized</b><br>Focus on organizational leaders' capacity to adopt and support the intervention; middle managers' capacity to implement, supervise, and sustain the intervention; and practitioners' capacity to deliver the intervention. <sup>4,17,18</sup><br><br><b>When horizontal, decentralized</b><br>Focus on capacity to engage partners and to facilitate collaborative decision making.<br>19,20 |

EBI = Evidence-based Intervention, TA = Technical Assistance, CB = Capacity Building

Table 3. (continued)

| Salient Variation                                                          | Guidance for Tailoring Capacity Building                                                                        |                                                                                                                                                                                                    |                                                                                                                                                                                                                                                                |
|----------------------------------------------------------------------------|-----------------------------------------------------------------------------------------------------------------|----------------------------------------------------------------------------------------------------------------------------------------------------------------------------------------------------|----------------------------------------------------------------------------------------------------------------------------------------------------------------------------------------------------------------------------------------------------------------|
|                                                                            | Factor                                                                                                          | EBI Selection/Marketing                                                                                                                                                                            | CB Structure & Types (in addition to Training, TA, Tools)                                                                                                                                                                                                      |
| <b>Context: Setting's Overall capacity</b> <sup>11,12,21</sup>             | <b>When low</b><br>Select EBIs that embed change in existing technologies or operating procedures. <sup>4</sup> | <b>When low</b><br>Efforts to build capacity to adopt and implement EBIs may not be successful. <sup>9,11,12,14</sup>                                                                              | <b>When low</b><br>Focus on building overall capacity prior to focusing on EBIs. <sup>4</sup>                                                                                                                                                                  |
| <b>Context: EBI-Setting Resources Fit</b> <sup>1-3,15,17,21-24 13,18</sup> | <b>When poor fit</b><br>If possible, select an EBI that provides a better fit.                                  | <b>When poor fit</b><br>Provide <i>incentives</i> (funding or in-kind resources) to build capacity.                                                                                                | <b>When poor fit</b><br>Focus on capacity to adapt EBI and/or acquire additional resources. <sup>7,15</sup>                                                                                                                                                    |
| <b>Context: EBI-Setting Values Fit</b> <sup>11,19,22 21,23 13,16,18</sup>  | <b>When poor fit</b><br>Select an EBI that provides a better fit.<br>Reframe EBI marketing.                     | <b>When poor fit</b><br>Strengthen CB <i>provider/recipient collaboration</i> .<br>Facilitate <i>peer networking</i> .<br><i>Assess and provide feedback</i> on performance. <sup>8,13,16,21</sup> | <b>When poor fit</b><br>Focus on capacity (motivation) to adopt and implement EBIs. <sup>8</sup>                                                                                                                                                               |
| <b>Context: Stakeholder Unity/Polarization</b> <sup>18,19,25</sup>         | <b>When polarized</b><br>Select an EBI that provides a better fit.<br>Reframe EBI marketing.                    | <b>When polarized</b><br>Provide more CB ( <i>dose</i> ) than when lower. <sup>7</sup>                                                                                                             | <b>When unified</b><br>Focus on capacity for a technical, rational approach to adoption/implementation. <sup>19,25</sup><br><br><b>When polarized</b><br>Focus on capacity for strategic and political approaches to adoption/implementation. <sup>19,25</sup> |

Variation in CB type/structure are italicized. EBI = Evidence-based Intervention, TA = Technical Assistance, CB = Capacity Building

1. Damschroder, L. J., Aron, D. C., Keith, R. E., Kirsh, S. R., Alexander, J. A., & Lowery, J. C. (2009). Fostering implementation of health services research findings into practice: a consolidated framework for advancing implementation science. *Implementation Science*, 4, 50.
2. Atun, R., de Jongh, T., Secci, F., Ohiri, K., & Adeyi, O. (2010). Integration of targeted health interventions into health systems: a conceptual framework for analysis. *Health Policy Plan*, 25(2), 104-111.
3. Lanham, H. J., Leykum, L. K., Taylor, B. S., McCannon, C. J., Lindberg, C., & Lester, R. T. (2013). How complexity science can inform scale-up and spread in health care: Understanding the role of self-organization in variation across local contexts. *Social Science & Medicine*, 93, 194-202.
4. Scheirer, M. A. (2013). Linking sustainability research to intervention types. *American Journal of Public Health*, 103(4), e73-80.
5. May, C. R., Finch, T., Ballini, L., MacFarlane, A., Mair, F., Murray, E., . . . Rapley, T. (2011). Evaluating complex interventions and health technologies using normalization process theory: development of a simplified approach and web-enabled toolkit. *BMC Health Services Research*, 11, 245.
6. May, C. R., Mair, F., Finch, T., MacFarlane, A., Dowrick, C., Treweek, S., . . . Montori, V. M. (2009). Development of a theory of implementation and integration: Normalization Process Theory. *Implementation Science*, 4, 29.
7. Le, L. T., Anthony, B., Broheim, S. M., Holland, C. M., & Perry, D. F. (2014). A technical assistance model for guiding service and systems change. *Journal of Behavioral Health Services & Research*, 1-15.
8. Leeman, J., Baernholdt, M., & Sandelowski, M. (2007). Developing a theory-based taxonomy of methods for implementing change in practice. *Journal of Advanced Nursing*, 58(2), 191-200.
9. Snowden, D. J., & Boone, M. E. (2007). A leader's framework for decision making. *Harvard Business Review*, November, 1-9. 10.
10. DeGross, A., Schooley, M., Chapel, T., & Poister, T. H. (2010). Challenges and strategies in applying performance measurement to federal public health programs. *Evaluation and Program Planning*, 33(4), 365-372.
11. Elwyn, G., Taubert, M., & Kowalczyk, J. (2007). Sticky knowledge: a possible model for investigating implementation in healthcare contexts. *Implementation Science*, 2, 44.
12. Kitson, A. L., Rycroft-Malone, J., Harvey, G., McCormack, B., Seers, K., & Titchen, A. (2008). Evaluating the successful implementation of evidence into practice using the PARIHS framework: theoretical and practical challenges. *Implementation Science*, 3, 1.
13. Yuan, C. T., Nembhard, I. M., Stern, A. F., Brush, J. E., Jr., Krumholz, H. M., & Bradley, E. H. (2010). Blueprint for the dissemination of evidence-based practices in health care. *Issue Brief (Commonwealth Fund)*, 86, 1-16.

14. Dreisinger, M. L., Boland, E. M., Filler, C. D., Baker, E. A., Hessel, A. S., & Brownson, R. C. (2012). Contextual factors influencing readiness for dissemination of obesity prevention programs and policies. *Health Education Research, 27*(2), 292-306.
15. Wandersman, A., Duffy, J., Flaspohler, P., Noonan, R., Lubell, K., Stillman, L., . . . Saul, J. (2008). Bridging the gap between prevention research and practice: the interactive systems framework for dissemination and implementation. *American Journal of Community Psychology, 41*(3-4), 171-181.
16. Rogers, E. M. (2003). *Diffusion of Innovations*. New York: Free Press.
17. Fixsen, D.L., Naoom, S. F., Blasé, K. A., & Friedman, R. M. (2005). Implementation research: A synthesis of the literature. Tampa, FL: University of South Florida, The National Implementation Research Network.
18. Weiner, B. J. (2009). A theory of organizational readiness for change. *Implementation Science, 4*, 67.
19. Contandriopoulos, D., Lemire, M., Denis, J. L., & Tremblay, E. (2010). Knowledge exchange processes in organizations and policy arenas: a narrative systematic review of the literature. *Milbank Quarterly, 88*(4), 444-483.
20. Clavier, C., Senechal, Y., Vibert, S., & Potvin, L. (2012). A theory-based model of translation practices in public health participatory research. *Sociology of Health & Illness, 34*(5), 791-805.
21. Greenhalgh, T., Robert, G., Macfarlane, F., Bate, P., & Kyriakidou, O. (2004). Diffusion of innovations in service organizations: systematic review and recommendations. *Milbank Quarterly, 82*(4), 581-630.
22. Durlak, J. A., & DuPre, E. P. (2008). Implementation matters: a review of research on the influence of implementation on program outcomes and the factors affecting implementation. *American Journal of Community Psychology, 41*(3-4), 327-350.
23. Mendel, P., Meredith, L. S., Schoenbaum, M., Sherbourne, C. D., & Wells, K. B. (2008). Interventions in organizational and community context: a framework for building evidence on dissemination and implementation in health services research. *Administration and Policy in Mental Health, 35*(1-2), 21-37.
24. Ogilvie, D., Cummins, S., Petticrew, M., White, M., Jones, A., & Wheeler, K. (2011). Assessing the evaluability of complex public health interventions: five questions for researchers, funders, and policymakers. *Milbank Quarterly, 89*(2), 206-225.
25. Denis, J. L., Hebert, Y., Langley, A., Lozeau, D., & Trottier, L. H. (2002). Explaining diffusion patterns for complex health care innovations. *Health Care Management Review, 27*(3), 60-73.
